# Supplementary material for: Proteomics and Drug Repurposing in CLL towards Precision Medicine
Source: Cancers (Basel). 2021 Jul 6;13(14):3391. doi: 10.3390/cancers13143391 (PMC8303629; doi:10.3390/cancers13143391)
Supplement: Supplementary file 1 [file cancers-13-03391-s001.zip]

Archive with 6 entries (6 files):
- Figure S1 drugs in CLL.jpg
- Figure S2 proteomics in CLL.jpg
- Supplementary Materials.pdf
- TableS1_ Driver mutations.xlsx
- TableS2_Drugs in CLL.xlsx
- TableS3_Proteomic_data_in_CLL_R3.xlsx
