# Supplementary material for: Proteomics and Drug Repurposing in CLL towards Precision Medicine
Source: Cancers (Basel). 2021 Jul 6;13(14):3391. doi: 10.3390/cancers13143391 (PMC8303629; doi:10.3390/cancers13143391)
Supplement: Supplementary file 1 [file cancers-13-03391-s001.zip › TableS1_ Driver mutations.xlsx]

## Sheet: TableS1_CLL_Driver_mutations
Table S1. Driver mutations in 38 genes in CLL. CLL is characterized by highly varying genetic mutations, with just a handful of mutated genes common to more than 5% of patients. All these mutations are particularly useful as prognostic biomarkers of the disease, as well as putative indicators for therapeutic treatment options (+ : many indications found, ++ : clinical practice, - : no indications…
Driver mutations	Pathway involved	Prognostic biomarker	Therapeutic indicator	References
ARID1A	Chromatin remodeling	+	-	Puente et al. 2015
ATM	DNA damage; Cell cycle control	++	+	Reddy et al. 2018
BCOR	NFKB pathway; Transcription	+	-	Mosquera et al. 2019
BIRC3	NFKB pathway; Apoptosis; Inflamatory pathway	++	-	Diop et al. 2020
BRAF	MARK-ERK pathway	++	+	Giménez et al. 2019
CDKN2A/B	Cell cycle control	++	-	Edelmann et al. 2020
CHD2	Chromatin remodeling	++	-	Rodríguez et al. 2015
DTX1	Notch1 signaling	+	-	Mosquera et al. 2019
EGR2	NFKB pathway; Transcription	++	-	Young et al. 2017
EWSR1	RNA processing	+	-	Brieghel et al. 2020
FAM50A	RNA processing	+	-	Amin et al. 2016
FBXW7	Notch1 signaling; MYC related	++	-	Rossi et al. 2019
HIST1H1E	Chromatin remodeling	+	-	Moia et al. 2019
IKZF3	B-lymphoid development pathway	++	-	Takahashi et al. 2015
IRF4	NFKB pathway; Transcription	++	-	Asslaber et al. 2019
KRAS	MARK-ERK pathway	++	-	Giménez et al. 2019
LPHN3	G-protein coupled receptors	+	-	Mosquera et al. 2019
LRP1B	low-density lipoprotein	+	-	Mosquera et al. 2019
LTB	TNF family	+	-	Mosquera et al. 2019
MAP2K1	MARK-ERK pathway	++	-	Giménez et al. 2019
MED12	Transcription	++	-	Kämpjärvi et al. 2015
MGA	MYC related (cell cycle)	++	-	Paoli et al. 2013
MYC	Cell cycle control	++	-	Li et al. 2016
MYD88	Inflamatory pathway	++	+	Improgo et al. 2019
NOTCH1	Notch1 signaling	++	+	López-Guerra et al. 2020
NRAS	MARK-ERK pathway	++	-	Giménez et al. 2019
POT1	DNA damage	++	-	Ramsay et al. 2013
PTPN11	MARK-ERK pathway	++	+	Jenkins et al. 2018
RPS15	Ribosomal processing	++	-	Bretones et al. 2018
SAMHD1	Immune response; DNA damage	+	+	Davenne et al. 2020
SETD2	Methylation	++	-	Parker et al. 2016
SF3B1	RNA metabolism; DNA damage	++	-	Wan et al. 2013
SPEN	Notch1 signaling	+	-	Edelmann et al. 2020
TP53	DNA damage; Cell cycle control	++	++	Reddy et al. 2018
WDFY3	Autophagy	+	-	Mosquera et al. 2019
XPO1	Ribosomal processing	++	+	Jain et al. 2016
ZMYM3	Chromatin remodeling	++	-	Puente et al. 2015
ZNF292	RNA and ribosomal processing	++	-	Puente et al. 2015
