# Supplementary material for: Proteomics and Drug Repurposing in CLL towards Precision Medicine
Source: Cancers (Basel). 2021 Jul 6;13(14):3391. doi: 10.3390/cancers13143391 (PMC8303629; doi:10.3390/cancers13143391)
Supplement: Supplementary file 1 [file cancers-13-03391-s001.zip › TableS2_Drugs in CLL.xlsx]

## Sheet: TableS2_Drugs_in_CLL
Table S2. Drugs used for CLL therapy. Representative categories of CLL drugs: chemotherapeutics (nitrogen mustards, antimetabolites) and monoclonal antibodies, and BAKs- and BCL-2 inhibitors.
A. FDA approved drugs for CLL
Drug Name	Description	Mechanism of action	Line of therapy
Acalabrutinib	BTK inhibitor	covalent bond with a Cys481 in the BTK active site	2 or 3
Alemtuzumab	anti-CD52 Ab	against the 21-28 kD cell surface glycoprotein; antibody-dependent lysis	2
Bendamustine	alkylating agent	crosslinks between DNA bases	2
Chlorambucil	alkylating agent	crosslinks between DNA bases	1
Cladribine	Purine antimetabolite	incorporated into DNA	2 or 3
Cyclophosphamide	Nitrogen mustard	crosslinks between DNA bases	1
Dexamethasone	Corticosteroid	appears to improve the therapeutic efficacy	2
Duvelisib	PI3K Inhibitor	Inhibitor of the isoform γ and δ of PI3K	2 or 3
Fludarabine	antimetabolite drug	Inhibiting DNA polymerase alpha, ribonucleotide reductase and DNA primase	1
Hyaluronidase	Adjunct in subcutaneous rehydration therapy	Increase the permeability of connective tissue and the absorption of other drugs	-
Ibrutinib	ΒΤΚ inhibitor	covalent bond with a Cys481 in the BTK active site	1
Idelalisib	PI3K Inhibitor	Inhibits P110δ, the δ isoform of PI3K	1
Obinutuzumab	anti-CD20 Ab	Binds to CD20 (Type II); antibody-dependant and direct cytotoxicity	1
Ofatumumab	anti-CD20 Ab	Binds to the small and large extracellular loops of the CD20; CCD and ADCC	2 or 3
Pentostatin	anti-metabolite	Adenosine deaminase inhibitor	2 or 3
Prednisone	Corticosteroid	appears to improve the therapeutic efficacy	2 or 3
Rituximab	anti-CD20 Ab	Binds to CD20; CDC and ADCC	1
Venetoclax	BCL-2 inhibitor	Restore the process of apoptosis; activation of caspase enzymes	1
Vincristine	Vinca alkaloid	Interaction with tubulin; inhibition of mitosis at metaphase	2 or 3
B. Drugs in clinical trials for CLL
Drug Name	Description	Mechanism of action	Clinical trial phase
Blinatumomab	BiTE-class Ab	Bispecific CD19-directed CD3 T-cell engager that binds to CD19 (B-lineage) and CD3 (T cells)	I
Dasatinib	BAK inhibitor	Src-Lyn inhibitor	II
Entospletinib	BAK inhibitor	Syk inhibitor	I
Fostamatinib	BAK inhibitor	Syk inhibitor	I
Gossypol compounds	BCL-2 inhibitor	Restore the process of apoptosis; activation of caspase enzymes	I
Navitoclax	BCL-2 inhibitor	Restore the process of apoptosis; activation of caspase enzymes	II
Nivolumab	anti-PD‐1	antagonizes its interaction with PD-L1 + PD-L2	II
Obatoclax	BCL-2 inhibitor	Restore the process of apoptosis; activation of caspase enzymes	II
Oblimersen	BCL-2 inhibitor	Restore the process of apoptosis; activation of caspase enzymes	I
Pembrolizumab	anti-PD‐1	antagonizes its interaction with PD-L1 + PD-L2	II
Tirabrutinib	BTK inhibitor	-	I
Vecabrutinib	BTK inhibitor	-	I
Umbralisib	PI3K Inhibitor	PI3Kδ Inhibitor	II
Zanubrutinib	BTK inhibitor	Covalent bond with Cys481 in the BTK active site	III
