# Supplementary material for: Proteomics and Drug Repurposing in CLL towards Precision Medicine
Source: Cancers (Basel). 2021 Jul 6;13(14):3391. doi: 10.3390/cancers13143391 (PMC8303629; doi:10.3390/cancers13143391)
Supplement: Supplementary file 1 [file cancers-13-03391-s001.zip › TableS3_Proteomic_data_in_CLL_R3.xlsx]

## Sheet: TableS3a_Proteomics_in_CLL
Table S3a: Proteomics data in CLL. Overview of the proteomics studies in CLL, representing an extended version of main text Table 3. Each column depicts the main characteristics of the studies presented. SAMPLES and COMPARISON: The type of biological model used in each study; METHOD: The method used for the proteomic analysis; OUTCOME: The main findings of each study.
	PUBLICATION	SAMPLES					COMPARISON			METHOD								OUTCOME
		In vitro model cells	Primary cells	Mouse model	Plasma	Serum	Healthy controls	Other diseases	Treatment	MS/MS	Arrays	Label	Label-free	Global Proteome	Sub-proteome	Targeted proteome	PTMs	Public Data	Proposed prognostic biomarker	Proposed diagnostic biomarker
IGHV mutations	Cochran et al, 2003		6U + 6M							MALDI-TOF									CapZβ, 14-3-3β, LBP, NPM1
	Barnidge et al, 2005		1U + 1M							LTQ		ICAT			cytoplasm + membrane				COX 6B
	Rees-Unwin et al, 2010		4U + 4M							QSTAR‐Pulsar XL									NPM1
	Eagle et al, 2015		9U + 9M							Triple TOF		iTRAQ						PXD001512	(cell migration)
	Thurgood et al, 2019		6U + 6M				3			Triple TOF					cytoplasm + membrane				(metabolic shift)	(metabolic shift)
	Eagle et al. 2021		3U + 3M				3			SWATH-MS								PXD011330	method development
BCR signaling	Perrot et al, 2011		3U + 3M						BCR ligation	MALDI-TOF		Cy dyes					2D-DIGE		PDCD4, RAD23B, LPS1, HNRNPK, HS1
	Kashuba et al, 2013		3P						BCR ligation	MALDI-TOF									LMWK
	Díez et al, 2017		9P							LTQ Orbitrap Velos					peptide sequencing of BCR			PXD004466
Cytogenetics	Voss et al, 2001		24P (11q22‐q23, 13q14, 17p13							MALDI-TOF									redox enzymes, PDI, HSP27 (17p13)
	Díez et al, 2016		14P (13q14, 17p13.1, trisomy 12, NOTCH1)				63			LTQ Orbitrap Velos		Cy dyes			cytoplasm	224 signaling proteins			JUN, cyclin A/B1/D1, PRKC, RAF1 (13q14), CDKN2A, JNK, p21 CDK (17p13.1), CDK4/6, JUP, MYH9, cyclin B1, PKCγ, p21 CDK, β-synuclein, CFL1, HDAC1, PPP1CA, PRKCB (NOTCH1)
	Bretones et al, 2018	MEC-1 (RPS15-mutations)								Orbitrap Fusion		TMT						PXD010924	metabolic shift
Histones	Su et al, 2009		40P				4			ESI-TOF		SILAC			histones					H2AFL, H2AFA/M
	Glibert et al, 2014		6U + 6M				50+			Q-TOF		iTRAQ			histones					cH2A
	Singh et al, 2015		87P				5			Q-TOF					histones				H2A (14,063kDa)
Microenvironment	O'Hayre et al, 2010		5P						CXCL12-stimulated	LTQ ion trap						IMAC phosphopeptide enrichment	phosphoproteomics		PDCD4, HSP27
	Prieto et al, 2017				5 progres. + 5 indol. (4 year)					LTQ Velos					exosomes			PXD005941	S100-A9
	Haderk et al, 2017				4P		4			LTQ Orbitrap XL					exosomes			PXD004420		annexins, actin-/Ras-related, 14-3-3 signaling
	Mangolini et al, 2018			EL08-1D2 Notch2 signaling						Orbitrap Fusion		TMT			membrane			PXD010401	Notch2 activation pre-requisite for Wnt signalling
Subcellular	Boyd et al, 2003		10P							MALDI-TOF					membrane					MIG2B, BCNP1
	Miguet et al, 2009		1P					SLL + MCL		Q-TOF					membrane					CD148 for MCL
	Henrich et al, 2007	MEC-1						T-ALL, AML + BL		MALDI-TOF		Cy dyes			nuclear					prohibitin, HSP70C, snRNP F, hnRNP H3/K, PCNA, AUF1
	Mayer et al, in 2017	JVM-13	9P				6 (diff. aging)			Q Exactive Orbitrap					cytoplasm + nuclear			PXD006570-PXD006572, PXD006576, PXD006578, PXD006589-PXD006591		similarity to aged HD and stem cells, metabolic enzymes (proteome signature)
	Gez et al, in 2007	MEC1						AML, T-ALL +BL		Q-STAR XL		Cy dyes			cytoplasm					MTHFD1, β-tubulin, stathmin, TAGLN2, elongation factor 2
Biomarker investigation	Scielzo et al, 2005		7 progres. + 7 indol.							MALDI-TOF									HS1 (phosphorylated)
	Miguet et al, 2006					39P	20			SELDI-TOF						range of interesting				S-sulfonated TTR
	Alsagaby et al, 2014		6 progres. + 6 indol.							MALDI-TOF		iTRAQ							THRAP3, TCL-1, S100A8, MYH9
	Huang PY et al, 2016		27P + 50P (indol. + progres.)							2DLC-MS/MS		iTRAQ				SRM			prohibitin, PARP1, RhoA, Rac2, MYH9, DHE3, TIF1B, ANP32A, HIST1H1C, SET, and of heat shock proteins, CH10, CH60
	Johnston et al, 2018		14P				3			LTQ Orbitrap Elite		TMT						PXD002004		(surface markers, BCR signaling , mRNA processing and splicing)
	Chen et al. 2021						3			RIME		TMT				linked ZAP-70 complexes		PXD002004	ZAP70
Comparison other diseases	Marina et al, 2008				10P			CML			Proto-Array									(annotation)
	Schröder et al, 2013				19P		100	DLBCL + FL			Ab microarray	Dy dyes				810				TSN16, NPT1, PCNA, CATD, TNFA, TNR6 (FAS), TR10C, IL8, VCAM
	Johnston et al, 2017			Eμ-TCL1 (18-20)			12	BL		Orbitrap Elite Velos Pro		TMT, iTRAQ				SEC				IL5-R,haptoglobin, nucleolin, 60S RPL35, HSP70- 4, 60S RPL23a, ITIH1
	Khodadoust et al, 2019		2P					FL + DLBCL		Orbitrap Fusion Lumos/ LTQ Elite					MHC-I/II			PXD010808		presentation of Ig neoantigens
Pharmaceutical treatment	Henrich et al, 2011	MEC-1							2-FaraA	Q-STAR XL		Cy dyes			nuclear				CaM, PHB, β-actin, SSRP1, RPP2B, fumarate hydratase, SRSF3, RPA2
	Che et al, 2013	MEC-1							SNX-7081	Q-Star Elite		iTRAQ			nuclear, cytoplasm + mitochondria				DDB1, MCM2, c-Myc, PCNA, pRb, cyclin D1
	Kaufman et al, 2015	MEC-1							SNX-7081 + 2-FaraA	LTQ-XL									γH2AX
	Kruse et al, 2010								kinase inhibitors (BMS-387032 and flavopiridol)	LTQ-Orbitrap		iTRAQ				Kinobeads profiling			CDK9, cyclin T1, AFF3/4, MLLT1 (p-TEFb complex)
	Zhuojun et al. 2020								HSP90i or Ibrutinib			iTRAQ							ROR1
	Beckmann et al. 2021	Beckmann et al. 2021	3U + 3M						ibrutinib	Q Exactive (Plus)		iTRAQ					TiO2-based phosphopeptide enrichment	PXD016421	MARCKS
RPPA	Shull et al. 2015		18P				6				167									eIF4G, 4E-BP1 phosphor.
	Frezzato et al. 2016		57P (20M +32U)				11				51								ZAP70	HSP70
	Patel et al. 2018		10P						acalabrutinib		~300									BCR axis
	Vangapandu et al. 2018		31P						presence/absence of stromal cells		210								Caveolin-1
Comments:
"Black boxes" depict the presentation of the characteristic referred in the column of each study
Biomarkers depicted in red are “reverse” biomarkers, meaning they were found downregulated and may have a protective role against the disease or disease progression.
Plain text out of "black boxes" corresponds to important information regarding the corresponding column (that however is not the desired information per column)
Abbreviations:
MS/MS: tandem mass spectrometry
PTM: post translation modifications
M: mutated
U: unmutated
P: patient
progres.: progressive
indol.: indolent
SLL: small lymphocytic lymphoma
ALL: acute lymphoblastic leukemia
AML: acute myeloid leukemia
BL: Burkitt lymphoma
CML: chronic myeloid leukemia
DLBCL: diffuse large B-cell lymphoma
RPPA: Reverse Phase Protein Array

## Sheet: TableS3b_Proposed_biomarkers
Table S3b: Proposed biomarkers by the proteomic studies in CLL and number of cases examined
Publication	Cases	Biomarkers
		Prognostic	Diagnostic
Cochran et al, 2003	12	CapZβ
		14-3-3β
		LBP
		NPM1
Barnidge et al, 2005	2	COX 6B
Rees-Unwin et al, 2010	8	NPM1
Eagle et al, 2015	18	CALDAG-GEF1
		ITGAL
		ITGB2
		Talin
		myosins
		ARHGEF1
		DOCK2
		G-protein I family
		ARF6
		actin
		actin cytoskeletal
		aLβ2
		dynamin-2
		CD44
		MHC class II
		LEF-1
		MNDA
		TCL-1
Thurgood et al, 2019	12		GAPDH
			HMGN2
			PKM
			CALR
			EDF1
			H3F3A
			HMGN4
			CLTA
			ACLY
			NUTF2
			IDH2
			TXNRD2
			HIST1H4A
			AIFM1
			MDH2
			CDC5L
			CXCR3
			ABCF3
			FABP3
			HADH
			HADHB
			OSBPL1A
			PGK
			PDH
			ACS1
			CS
			ACAT
			FAM107B
			HNRNPUL1
			PLIN3
			CBR1
			PNP
			AK1
			MIF
			CAPZA2
			CES1
			SOD2
			CDC42
			SPRYD4
			RPS21
			HPRT1
			WARS
			IGKC
			DLST
			DLD
			SDHB
			S100A6
		FKBP4
		RAP1A
		CAT
		ITGB1
		DESG1
		GAPDH
		GLUT2
		NAXE
Eagle et al, 2021	6
Perrot et al, 2011	6	PDCD4
		RAD23B
		LPS1
		HNRNPK
		HS1
		HCLS1- acid form
Kashuba et al, 2013	3	LMWK
Díez et al, 2017	9
Voss et al, 2001	24	PDI
		GST
		DmTPx-2
		HSP27
Díez et al, 2016	14	JUN
		cyclin A/B1/D1
		CDKN2A
		JNK
		CDK4/6
		JUP
		MYH9
		PRKC
		RAF1
		p21 CDK
		cyclin B1
		PKCγ
		p21 CDK
		β-synuclein
		CFL1
		HDAC1
		PPP1CA
		PRKCB
Bretones et al, 2018	1	RPS15
Su et al, 2009	40		H2AFL
			H2AFA/M
Glibert et al, 2014	12		cH2A
Singh et al, 2015	87	H2A (14,063kDa)
O'Hayre et al, 2010	5	PDCD4
		HSP27
Prieto et al, 2017	10	S100-A9
Haderk et al, 2017	4
Mangolini et al, 2018	1
Boyd et al, 2003	10		MIG2B
			BCNP1
Miguet et al, 2009	1
Henrich et al, 2007	1		prohibitin
			HSP70C
			snRNP F
			hnRNP H3/K
			PCNA
			AUF1
Mayer et al, in 2017	9		CD200
			PIGR
			MIF
			DECR1
			PAFAH1B2
			GLO1
			ID3
			HMG20B
			TAX1BP1
			ZNF207
			CCDC88A
			ALOX5
			GLS
			SLC25A13
			SLC3A2
			ACADM
			ACAA2
			CPT2
			AMPD2
			SLC6A4
			PLSCR1
			TBXAS1
Gez et al, in 2007	1		MTHFD1
			β-tubulin
			stathmin
			TAGLN2
			elongation factor 2
Scielzo et al, 2005	14	HS1 (phosphorylated)
Miguet et al, 2006	39		S-sulfonated TTR
Alsagaby et al, 2014	12	THRAP3
		TCL-1
		S100A8
		MYH9
Huang PY et al, 2016	77	prohibitin
		PARP1
		RhoA
		Rac2
		MYH9
		DHE3
		TIF1B
		ANP32A
		HIST1H1C
		SET
		CH10
		CH60
Johnston et al, 2018	14		ST14/matriptase
			CD6
			PTPN22
			CDKN1B/p27
			TRAF1
			JUND
			BMI1
			IKZF3/Aiolos
			TOSO
			DIABLO/SMAC
			SIT1
			CD5
			ROR1
			BCL2
			CD23
			CKAP4
			INPP5F
			Wee1
			CD79B
			PIGR
			LAX1
			prolectin
			ATP2B4
			TMCC3
			FCRL5
			ST6GAL1
			FCRL2
			C17orf80
			NPTN
			ICAM3
			CLEC17A
			PRPFs
			SNRNPs
			HNRNPs
			HDAC7
			INPP5F
		IGHM
		CD38
		CD49D/ITGA4
Chen et al, 2021	N/A	ZAP70
Marina et al, 2008	10
Schröder et al, 2013	19		TSN16
			NPT1
			PCNA
			CATD
			TNFA
			TNR6 (FAS)
			TR10C
			IL8
			VCAM
Johnston et al, 2017	1		IL5-R
			haptoglobin
			nucleolin
			60S RPL35
			HSP70- 4
			60S RPL23a
			ITIH1
Khodadoust et al, 2019	2
Henrich et al, 2011	1
Che et al, 2013	1
Kaufman et al, 2015	1
Kruse et al, 2010	1
Zhuojun et al, 2020	N/A
Beckmann et al. 2021	3
Shull et al. 2015	18		eIF4G
			4E-BP1 phosphor.
Frezzato et al. 2016	57	ZAP70	HSP70
Patel et al. 2018	10
Vangapandu et al. 2018	31	Caveolin-1
Comments:
Biomarkers depicted in red are “reverse” biomarkers, which means that they found downregulated and may have a protective role against the disease or disease progression.
N/A corresponds to not available information

## Sheet: TableS3c_DR_prognostic_biomark
Table S3c: Repurposed drugs for CLL prognosis. Drug repurposing based on prognostic biomarkers using bioDBnet
Gene Symbol	DrugBank Drug Name
ANP32A	-
ATJ10	-
CAT	leafPro CBDmed Oil FS QP 20%; leafPro CBDmed Oil FS QP 5%; leafPro CBDmed Oil T-FS QD 3%; leafPro CBDmed Softgels FS QP 20; 4234 First Aid Kit; ECOLAB Hydrogen Peroxide; First Aid Only Hydrogen Peroxide; Hydrogen Peroxide 3 Percent; Hydrogen Peroxide Antiseptic; Hydrogen Peroxide Liq 10vol; Iris; Kimvent Oral Care Suction Swab pack; Orajel Antiseptic Alcohol-Free Mouth Sore Rinse; Orajel Antisept…
CAV1	-
CCNA1	-
CCNB1	-
CCNDBP1	-
CD38	Isatuximab; Sarclisa; Darzalex; Daratumumab
CD44	Ascorbyl Palmitate 2% / Hyaluronic Acid Sodium Salt 0.2% / Niacinamide 5% / Tretinoin 0.025%; bdr Bio cell mask; Hyaluronic Acid Gel; Hyaluronic acid; Hyaluronic Acid Sodium Salt 1% / Tacrolimus 0.1% / Urea 20%; HYLASE Wound; Clapiel Hyalon Serum; Curestin; Eldeen Age Twenty One Micro Therapy Program; Funees; Ginsamin Beauty; Hyaluronic Acid Sodium Salt 0.5% / Niacinamide 4% / Tretinoin 0.025%; K…
CDK4	Purvalanol; Ibrance; Alvocidib; Kisqali; Kisqali Femara Co-pack; Fostamatinib; Verzenio; Tavalisse; Palbociclib; Ribociclib; Abemaciclib
CDK6	Verzenio; Ibrance; (2S)-2-({6-[(3-Amino-5-chlorophenyl)amino]-9-isopropyl-9H-purin-2-yl}amino)-3-methyl-1-butanol; Kisqali Femara Co-pack; Ribociclib; Alvocidib; Abemaciclib; Fisetin; Palbociclib; Kisqali
CDKN2A	-
DEGS1	-
FKBP4	-
GAPDH	Adult Formula 50+; Body Rox; Chewable Calcium Plus Magnesium and Minerals; Complete Multivitamins and Minerals Tablets Timed Release; Fortifi-plus; Iron 25mg With Vit B-cmplx, Vit C, Cu & Mo; Men's Multi Master Formula; M.T.E.-4; Mte 4 Inj; Multi #2; Multiple Trace Metal Additive Solution; Multivitamins and Minerals With Betacarotene Tablets; Olympian Multi Vit Plus Minerals Tab; Osteoshield; Pre…
H1-2	-
H2AC19	-
HCLS1	-
HLA-DPA1	-
HNRNPK	Phenethyl Isothiocyanate; Artenimol
HSP27	-
HSPB1	Apatorsen; Phenethyl Isothiocyanate; Artenimol
HSPD1	24 Multivitamins + Minerals; Body Rox; Chelapro; Chela Zinc Plus; Coen.q10w.vit.c and E Beta-car.se Cu Zn Mn; Extra Once A Day; Fem Time Tab; healthy mamaBE WELL ROUNDED BE WELL ROUNDED; Icaps; Mega Multiple Minerals; Men's Biomultiple Vitamin and Mineral Supplement; Men's; Micro Plus 5 Concentrate; Multi Cal Mag Liquid; Multiple Vitamins and Minerals Tab; NicAzel; One A Day Tab; One Daily Vitami…
IGHM	C.A.G. Tab; Calcium Complex High Grade; Calcium & Magnesium With Potassium & Zinc; Cal-mag Plus K, Mn and Zn Caplets; Chelated Zinc Hvp Chelate 50mg - Tab; Chelated Zinc Tab 25mg; Chewable Zinc Wafers 10mg; Copper 3mg Plus Iron & Zinc Tab; Corvita 150; C-plus - Tab; Emuol V; Formula B; Formula Gly; Formula Hh; Formula Ma-vitamin E & Zinc Tab; Hi Potency B Complex W Chelated Minerals; Hvp Chelated…
ITGA4	R1295; Innohep; ATL1102; R411; Tysabri; Vedolizumab; Natalizumab; Innohep Disp.syr.-11700 Anti-XA Iu/ml; Entyvio; Tinzaparin; Logiparin Liq Sc 10000 Fxaiu/ml; CDP323
ITGB1	Thymoglobulin; Antithymocyte immunoglobulin (rabbit)
JUN	Adapalene and Benzoyl Peroxide; Tactupump; Arsenic Trioxide for Injection; Irbesartan Zentiva; Mylan-irbesartan Hctz; Ran-irbesartan Hctz; 12 Hour Nasal Decongestant; Aldex GS DM; Aleve-D Sinus and Cold; all day Allergy Relief D; Allegra-D 24 Hour; Allergy Relief d 12; Allergy Relief D 24 Hour; Balminil Cough and Flu; Benylin 4 Flu - Syrup; Benylin DM-D-AH Chewables for Children; Benylin Extra St…
JUP	Calcium and Magnesium W Zinc Tab; Calcium & Magnesium Citrate Plus D With Manganese, Potassium & Zinc; Calcium & Magnesium With Potassium, Zinc, Manganese & Vitamin D; Cal-mag Complete With Zinc, C and D; Chela Calmag-300 Plus Zinc D3; Chelated Zinc Hvp Chelate 50mg - Tab; Children's Chewable Tab; Children's Chewable Vit and Min Tab; Children's Chew Multi & Min Tab; Corvita 150; Db-7 Dietary Supp…
KNG1	24 Multivitamins + Minerals; 50 Plus Multiple Vitamins & Minerals; Adult Formula 50+; A.R.T.H. Away Formula; Cell-wise; Chewable Calcium Plus Magnesium and Minerals; Children's Chew Multi & Min Tab; Coen.q10w.vit.c and E Beta-car.se Cu Zn Mn; Copper; C. Vit-min Formula; Efferlife Multivitamins and Minerals; Formula O-care Vitamin and Mineral Supplement; Iron Plus Tab; Kanga-V Multivitamins & Mine…
LEF1	Edecrin Tab 50mg; Ethacrynate Sodium for Injection USP; Ethacrynic Sodium; Sodium Edecrin; Vpi-ethacrynate Sodium; Ethacrynic Acid; Ethacrynate Sodium; Ethacrynate Sodium for Injection; Etacrynic acid; Edecrin; Ethacrynic acid; Edecrin Sodium
MAPK8	Halicin; Dynacin; Enca 50mg; Minolira Extended Release; Ran-minocycline; Ximino; 5-CYANO-N-(2,5-DIMETHOXYBENZYL)-6-ETHOXYPYRIDINE-2-CARBOXAMIDE; 2-fluoro-6-{[2-({2-methoxy-4-[(methylsulfonyl)methyl]phenyl}amino)-7H-pyrrolo[2,3-d]pyrimidin-4-yl]amino}benzamide; Arestin; Ava-minocycline; PHL-minocycline; PMS-minocycline; Ratio-minocycline; Riva-minocycline 50 mg; Riva-minocycline; Nolvadex; Apo-tam…
MNDA	-
MYH9	Artenimol
NAXE	-
NPM1	Artenimol; Clindap-T; Tactupump; Clindamycin 1% / Niacinamide 4% / Tretinoin 0.05%; Etretinate; Clarus; Hyaluronic Acid Sodium Salt 0.5% / Tazarotene 0.1%; Benzoyl Peroxide 2.5%, Clindamycin Phosphate 1%, Niacinamide 2% / Tretinoin 0.05%; Hydrocortisone 0.5% / Hydroquinone 4% / Tretinoin 0.025%; Hydroquinone 5% / Tretinoin 0.025% / Triamcinolone Acetonide 0.025%; Hydroquinone 8% / Tretinoin 0.025…
PDCD4	-
RAP1A	-
S100A8	24 Multivitamins + Minerals; 7030 Calcium Gold; Calcium 500 With Vitamin D Tab; Calcium and Magnesium 1:1 Plus Tablets; Calcium and Magnesium Citrate With Vitamin D; Calcium Chelate Plus Vit D; Calcium Gluconate Tablets USP 650 mg; Calcium Lactate Tab 84.5mg; Calcium Magnesium Avec Vitamine C; Calcium & Magnesium Plus Potassium & Zinc; Calcium, Magnesium, Zinc and D; Calcium Sandoz Syr 110mg/5ml;…
S100A9	7030 Calcium Premium; B & J Formula Dietary Supplement; B-Nexa; Bseltzer; Buffered Vitamin C Powder With Ca Mg and K; Cal-citrus; Calcium 600mg Dietary Supplement; Calcium and Magnesium Tablets; Calcium Chelate Plus Vit D; Calcium Citrate and Vitamin D 200mg/160iu; Calcium Liquid Syrup; Calcium-magnesium Cap 1:1 W Vitamin D; Calcium & Magnesium Plus Potassium & Zinc; Calcium & Magnesium With Vita…
SET	-
SLC2A2	Zanosar Sterile Powder; 50% Dextrose; Alcohol and Dextrose; Anticoagulant Citrate Dextrose A ACD-A; Dextrose monohydrate; Dianeal for Peritoneal Dialysis; Haemonetics Additive Solution Formula 3 (AS-3); Isolyte P in Dextrose; Lactated Ringers and Dextrose; Lidocaine Hydrochloride and Dextrose; SUEROLYTE Oral Electrolyte Solution Grape Flavor; SUEROLYTE Oral Electrolyte Solution Mango Flavor; SUER…
TCL1A	-
THRAP3	-
TRIM28	-
ZAP70	Fostamatinib; Tavalisse; Staurosporine

## Sheet: S3d_DR_CLL_diagnostic_biomarker
Table S3d: Repurposed drugs for CLL diagnosis. Drug repurposing based on diagnostic biomarkers using bioDBnet
Gene Symbol	DrugBank Drug Name
ABCF3	-
ACAA2	-
ACADM	Octanoyl-Coenzyme A; BumP DHA; 3-thiaoctanoyl-CoA; EnBrace HR; PramLyte; Flavin adenine dinucleotide; EnLyte
ACLY	Nexlizet; Nexletol; Bempedoic acid
ACSL1	Adenosine phosphate; ATP
AIFM1	EnBrace HR; MCC; Flavin adenine dinucleotide; PramLyte; BumP DHA; EnLyte
ALOX5	Chewable Vitamin E 400 I.U.; Enzogenol; E.S.T. Complex; Maximum Once A Day; Men's; Multi-Vitamin Drops with Fluoride and Iron; Multivitamin & Multimineral; Nutrilite Double X; Right Choice A.M. Multi Formula - Caplet; Selenium Plus; Granupas; Nemasol Sodium Tab 500mg; Enca 50mg; Minocycline-100; PHL-minocycline; leafPro CBDmed Oil T-FS QD 5%; Allbee C 800 Tab; Daily Balance Tab; Duet DHA 400 ec; …
ATP2B4	Desflurane; Halothane Liq 99.9%; Fluothane Anesthetic; Halothane; Suprane; Fluothane Liq Inh 1000mg/gm
BCL2	Apoptone; Taxespira; Halaven; Enzyme Tablets; Wizyoung Vitamin Collagen Essence Mask Pack; Zypanax; 50 Person ANSI; Advil Cold & Sinus Plus; Advil Extra Strength Liqui-gels; Advil Headache & Migraine Caplets; Advil Headache & Migraine Pain Extra Strength Caplets; Advil Liquigels; Advil Migraine Tablets; Advil Muscle and Joint; Auto 157; Basic Care Ibuprofen; Care One Ibuprofen Ib; Children's Ibup…
BCNP1	-
BMI1	-
C17orf80	-
CALR	50 Plus Multiple Vitamins & Minerals; Children's Chewable Multi-vitamin Complete With Minerals; CitraNatal Assure; Copper; Elite OB Prenatal Multivitamin; Hemarexin Tab; Kanga-V Multivitamins & Minerals; K.L. Vitamin-mineral; L.G.I.T.; Maintain Multiple Vitamin & Minerals; Men's Biomultiple Vitamin and Mineral Supplement; Milltrium Senior Vitamin and Mineral Supplement; Mineral Support; Multimine…
CATD	-
CCDC88A	-
CD200	-
CD23	-
CD5	-
CD6	-
CD79B	Polatuzumab vedotin; Polivy
CDC5L	-
CDKN1B	-
ch2a-IV	-
CKAP5	-
CLEC17A	-
CLTA	-
CPT3	-
CS	Acd-A; bdr Re-action natural low base skin refiner exfoliation essence; Bicaruvas; Bromo Seltzer; Care One Original Antacid and Pain Relief; Citrasate C1125; Citrasate C1150; Citric Buffered Normal Saline; Cytra-K; Haemonetics Anticoagulant Citrate Dextrose Solution; Hemosate Ultra Hs3125; HyVee Health Effervescent Antacid and Pain Relief; Leader Effervescent Antacid and Pain Relief; Publix Fast …
CXCR4	Soframycin Nasal Spray; Soframycin Sterile Eye Ointment 0.5%; Proctosedyl; Proctol Ointment; Sandoz Proctomyxin HC; Sandoz Proctomyxin HC Suppositories; Sofracort; Teva-proctosone; Mozobil; Soframycin Eye Drops 5mg/ml; AMD-070; Sofracort Sterile Ear/eye Ointment; Soframycin Eye Drops 0.5%; Sofra-tulle Strip 1%; Framycetin; Proctosedyl Ointment; Proctosedyl Sup; Sofra Tulle 10 X 10cm; Sofra-tulle …
DECR2	-
DIABLO	Phenethyl Isothiocyanate
EDF2	-
EEF2	Esketamine; Lumoxiti; Spravato; Moxetumomab Pasudotox; N~2~,N~2~-DIMETHYL-N~1~-(6-OXO-5,6-DIHYDROPHENANTHRIDIN-2-YL)GLYCINAMIDE; Diphthamide; Guanosine-5'-Diphosphate; Adenosine-5-Diphosphoribose
eIF4G	-
FABP4	Surfaxin; Propanoic acid; 9-benzyl-2,3,4,9-tetrahydro-1H-carbazole-8-carboxylic acid; Oleic Acid; Huile D'onagre Vitamin E; Amino-cerv; 5-(3-carbamoylbenzyl)-5,6,7,8,9,10-hexahydrocyclohepta[b]indole-4-carboxylic acid; 2-{[2-Oxo-2-(1-piperidinyl)ethyl]sulfanyl}-6-(trifluoromethyl)-4(1H)-pyrimidinone; 3-sulfino-L-alanine; Jayjun New Real Water Brightening Black Mask Step 01 Real Water Shining Vita…
FAS	-
FCRL2	-
FCRL5	-
GAPDH	Artenimol; Cell-wise; Chelamins Plus Tab; Chelated Copper Supplement - Tab 2mg; Chelazome Copper Cap 5mg; Classic Swiss One 10 Multivitamin and Mineral Tab; Coen.q10w.vit.c and E Beta-car.se Cu Zn Mn; Great Day/am Formula Tab; Guardyn Tab; Hsn Formula; Innersource Tab; Micro Cu; Micro Plus 6 (concentrate); Micro Plus 6 (pediatric); M-Natal Plus; Multi II IV Vi Tab; Multimineral Tablets; Multi-min…
GLO2	-
GLS	Indocyanine Green; PINPOINT Kit; Spy Agent Green; Aminosyn II 7% Injection; Aminosyn II 8.5% With 50% Dextrose; Kabiven; Olimel 3.3% E; Olimel 5.7% E; Primene 10%-liq IV; Endari; Proctosedyl Sup; Proctosedyl Suppositories; IC-Green; Indocyanine green acid form; Indocyanine green; Aminosyn II 8.5% M In 20% Dextrose (dual Chamber); Aminosyn II in Dextrose; Aminosyn II In Dextrose Injection; Cliniso…
H3F3A	-
HADH	3-Hydroxybutyryl-Coenzyme A; EnLyte; Xyzbac G; EnBrace HR; PramLyte; Zavitrol; Acetoacetyl-CoA; Epanova; Omega-3-carboxylic acids; Genicin Vita-Q; VitaXyme; BumP DHA; Mebolic; Vitazyme; Folika-V; NADH; Xyzbac; Zyvit; Lexazin; Omniquin; Omnivex
HADHB	-
HDAC8	AzesChew; Cavan Folate OB; Cavan Prenatal; Childrens Chewable Multiple Vitamins W.iron; Chewable Multivitamins Plus Iron; Children's Chewable Multivitamins and Minerals; Childrens Chewable Vitamins W Iron; Children's Multivitamins With Iron; Essential Vitamins and Minerals; Everyday Multiple Vitamins With Iron; Ferretts; Iron Fumarate and Aspartate, Glycinate, Ascorbic Calcium, Vitamin B12, Folic…
HIST1H2AE	-
HIST1H4A	-
HMG20B	-
HMGN2	-
HMGN4	-
HNRNPH1	Actyform; Advanced B & T Formula; A.R.T.H. Away Formula; Chelamins Plus Tab; Elite OB Prenatal Multivitamin; Fem Time Tab; Innersource Tab; Itabs Plus; Kanga-V Multivitamins & Minerals; Men's 50+; Micro Cu; Micro Plus 5 Concentrate; M T E 4 Concentrate Inj; Multi Vitamin & Minerals; Multivitamins and Minerals With Betacarotene Tablets; NicAzel; One Daily Vitamin and Mineral Dietary Supplement; Pr…
HP	Gumsol; HEB Mouth Sore Relief; Orajel 3X Medicated For Toothache and Gum; Trace Elements Solution Inj; Clear Eyes Cooling Itchy Eye Relief; Concept DHA; CVS Astringent Eye; Goodsense Irritation Relief Eye; Rohto Relief; Visine Totality Multi Symptom Relief; Benzocaine, Menthol, Zinc Chloride; Dermagran II Moisturizing Spray 1mg/ml; KANKA SoftBrush; Meijer Severe Toothache and Gum Relief Triple Me…
HSP70	-
HSP70C	-
HSP74	-
ICAM4	-
ID4	-
IDH3	-
IKZF3	-
IL5RA	Benralizumab; Fasenra Pen; Fasenra
IL9	-
INPP5F	-
ITIH2	Allergic Itch Relief; Anti Itch and Skin Protectant; Anti-Itch Cream; Anti-Itch Extra Strength; Caladryl Clear; Caldyphen Clear; Clear Anti Itch; Clear Anti-itch Lotion; Equaline Anti Itch; Family Care Anti-Itch; Family Wellness; Itch Relief; Rugid Itch and Pain Relief; TopCare Anti-Itch; Bseltzer; C.A.G. Tab; Calcium and Magnesium With Zinc; Calcium & Magnesium Citrate Plus D With Manganese, Pot…
JUND	-
LAX2	-
MDH3	-
MIF	3,4-Dihydroxycinnamic Acid; 3-(4-HYDROXYPHENYL)-4,5-DIHYDRO-5-ISOXAZOLE-ACETIC ACID METHYL ESTER; 3-FLUORO-4-HYDROXYBENZALDEHYDE O-(CYCLOHEXYLCARBONYL)OXIME; 4-HYDROXYBENZALDEHYDE O-(3,3-DIMETHYLBUTANOYL)OXIME; 4-Hydroxyphenylpyruvic acid; 6-HYDROXY-1,3-BENZOTHIAZOLE-2-SULFONAMIDE; 4-HYDROXYBENZALDEHYDE O-(CYCLOHEXYLCARBONYL)OXIME; 7-Hydroxy-2-Oxo-Chromene-3-Carboxylic Acid Ethyl Ester
MIG2B	-
MTHFD2	Genicin Vita-Q; Xyzbac; EnBrace HR; EnLyte; Lexazin; Omniquin; Tetrahydrofolic acid; VitaXyme; Xyzbac G; Zyvit; Zavitrol; Folika-V; Mebolic; Omnivex; PramLyte; BumP DHA; NADH; Vitazyme
NCL	-
NPT2	-
NPTN	-
NUTF3	-
OSBPL1A	-
PAFAH1B3	(1R)-1,2,2-trimethylpropyl (R)-methylphosphinate
PCNA	10 Person ANSI; 25 Person ANSI; 282 Mep Tab; 4142 First Aid Kit; 4211 First Aid Kit; 4217 First Aid Kit; 4229 First Aid Kit; 4346 First Aid Kit; 50 Person ANSI; 81 mg Low Dose Aspirin; Acetylsalicylic Acid A.S.A. Tablets 325mg; Acetylsalicylic Acid Extra Strength 500mg Tablets USP; Acetylsalicylic Acid Tab 300mg; Adult Low Dose; Aggrenox; Alka Seltzer; Alka-seltzer Flavoured - Evt; Alka-Seltzer P…
PDH	-
PGK	-
PHB	Didesmethylrocaglamide; Rocaglamide
PIGR	-
PKM	Body Rox; Cal Mag Plus - Tab; Chela Iron Plus C,b Complex; Chelamins Plus Tab; Chela Zinc Plus; C. Vit-min Formula; Formula O-care Vitamin and Mineral Supplement; Formula R Mineral Supplement; Hypo Vites Tab; Itabs Plus; Longevit-E - Capsule; Maintain Multiple Vitamin & Minerals; Mega Min Capsules; Micro Plus 6 (regular); Mineral Support; M.T.E.-4 Concentrated; M T E 4 Concentrate Inj; Multi Cal …
PRL	-
PRPF	-
PTPN23	-
ROR2	-
RPL23A	Artenimol; Puromycin; (S)-3-phenyllactic acid; Anisomycin
RPL35	Artenimol
SIT2	-
SLC25A14	-
SLC3A3	-
SNRNP	-
SOAT1	Mar-ezetimibe; Mylan-ezetimibe; Multinate DHA Extra; Omega-3-Acid Ethyl Ester; Omega-3 Well Pack; Renate DHA; Ag-ezetimibe; Mint-ezetimibe; Luvira; Omega-3-acid ethyl esters; Triklo; Ezetimibe; Gln-ezetimibe; Ipg-ezetimibe; M-ezetimibe; PMS-ezetimibe; Sandoz Ezetimibe; Teva-ezetimibe; Zetia; Omega-3-acid Ethyl Esters; Omtryg; Sure Result O3D3 System; Act Ezetimibe; Ran-ezetimibe; Concept DHA; Oma…
ST14	Benzamidine; Kinlytic (urokinase for Injection); Camostat; Urokinase; Kinlytic; Kinlytic Open-cath
ST6GAL2	-
STMN1	-
TAGLN3	-
TAX1BP2	-
TMCC4	-
TNFA	-
TOSO	-
TR10C	-
TRAF2	-
TSN17	-
TUBB	CA4P; Colchicine Tab 1mg; Colchiceine; Children's Chewable Multi-vitamin Complete With Minerals; Defense Caplets; Formula A.R.-th Dietary Supplement; Formula R Mineral Supplement; Icaps; Innersource Tab; Liquid Opti-minplex +d; Maxine Vitamin and Mineral Supplement; M T E 4 Concentrate Inj; Multi Cal Mag Liquid; Multi II IV Vi Tab; Multiple Vitamin Plus Minerals Tab; Multi Vitamin - Mineral; Natu…
TXNRD3	-
VCAM	-
WEE2	-
ZNF208	-

## Sheet: S3e_Proteomics_in_CLL_slim
Table S3e. Proteomic studies in CLL. The most representative studies involve IGHV mutational status, BCR signaling, cytogenetics and driver mutations, histones, cancerous microenvironments, prognostic biomarkers, subcellular compartments (nucleus, plasma membranes, lipid rafts, cytosols), comparison with normal cells or other diseases, and pharmaceutical treatments. With bold letters are indicate…
Categories	Bibliography	SAMPLES					COMPARISON			METHOD								OUTCOME
		In vitro model cells	Primary cells	Mouse model	Plasma	Serum	Healthy controls	Other diseases	Treatment	MS/MS	Arrays	Label	Label-free	Global Proteome	Sub-proteome	Targeted proteome	PTMs	Public Data	Proposed prognostic biomarker	Proposed diagnostic biomarker
IGHV mutations	Cochran et al, 2003[62]
	Scielzo et al, 2005[63]
	Barnidge et al, 2005[64]
	Rees-Unwin et al, 2010[65]
	Perrot et al, 2011[66]
	Alsagaby et al, 2014[67]
	Glibert et al, 2014[68]
	Eagle et al, 2015[69]
	Díez et al, 2016[70]
	Johnston et al, 2018[56]
	Thurgood et al, 2019[71]
	Eagle et al, 2021[72]
BCR signaling	Perrot et al, 2011[66]
	Kashuba et al, 2013[73]
	Díez et al, 2017[74]
Cytogenetics	Voss et al, 2001[75]
	Huang PY et al, 2016[76]
	Díez et al, 2016[70]
	Bretones et al, 2018[77]
Histones	Su et al, 2009[78]
	Glibert et al, 2014[68]
	Singh et al, 2015[79]
Micro-environment	O’Hayre et al, 2010[80]
	Prieto et al, 2017[81]
	Haderk et al, 2017[82]
	Mangolini et al, 2018[83]
Subcellular	Boyd et al, 2003[84]
	Miguet et al, 2009[85]
	Henrich et al, 2007[86]
	Mayer et al, in 2018[87]
	Gez et al, in 2007[88]
Biomarker investigation	Voss et al, 2001[75]
	Cochran et al, 2003[62]
	Boyd et al, 2003[84]
	Barnidge et al, 2005[64]
	Scielzo et al, 2005[63]
	Miguet et al, 2006[89]
	Gez et al, in 2007[88]
	Henrich et al, 2007[86]
	Su et al, 2009[78]
	Rees-Unwin et al, 2010[65]
	O’Hayre et al, 2010[80]
	Perrot et al, 2011[66]
	Kashuba et al, 2013[73]
	Alsagaby et al, 2014[67]
	Singh et al, 2015[79]
	Eagle et al, 2015[69]
	Díez et al, 2016[70]
	Huang PY et al, 2016[76]
	Prieto et al, 2017[81]
	Mayer et al, in 2018[87]
	Johnston et al, 2018[56]
	Thurgood et al, 2019[71]
	Chen et al, 2021[90]
Comparison with other diseases	Marina et al, 2008[91]
	Schröder et al, 2013[92]
	Johnston et al, 2017[93]
	Khodadoust et al, 2019[94]
Drug treatment	Henrich et al, 2011[95]
	Che et al, 2013[96]
	Kaufman et al, 2015[97]
	Kruse et al, 2011[98]
	Liu et al, 2020[99]
	Beckmann et al, 2021[100]
RPPA	Shull et al, 2015[101]
	Frezzato et al, 2016[102]
	Patel et al, 2018[103]
	Vangapandu et al, 2018[104]
